# Supplementary material for: Low-dimensional representation of Gaussian mixture model supervector for language recognition
Source: Springer Nature journal article supplement (doi:10.1186/1687-6180-2012-47), 2012-02-27

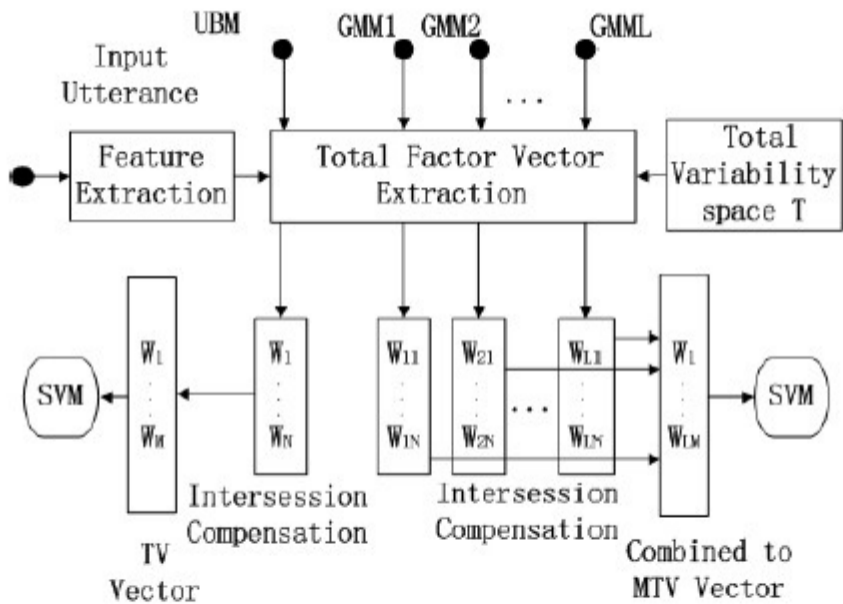

Supplement: 13634_2011_162_MOESM1_ESM.pdf [file 13634_2011_162_MOESM1_ESM.pdf]
